# Supplementary material
Source: PubMed Central journal article supplement (PMC6644079)
Supplement: ao8b02784_si_001.pdf [file ao8b02784_si_001.pdf]

## Supporting information for

# A Toolbox for the Synthesis of Multifunctionalized Mesoporous Silica Nanoparticles for Biomedical Applications

Cornelia von Baeckmann,<sup>1</sup> Rémy Guillet-Nicolas,<sup>1</sup> Damien Renfer,<sup>2</sup> Hanspeter Kählig,<sup>3</sup> Freddy Kleitz<sup>1\*</sup>

<sup>1</sup>Department of Inorganic Chemistry – Functional Materials, Faculty of Chemistry, University of Vienna, Währinger Straße 42, 1090 Vienna, Austria.

<sup>2</sup>Department of Chemistry, Université Laval, 1045 avenue de la Médecine, G1V0A6 Quebec, QC, Canada

<sup>3</sup>Institute of Organic Chemistry, Faculty of Chemistry, University of Vienna, Währinger Straße 38, 1090 Vienna, Austria.

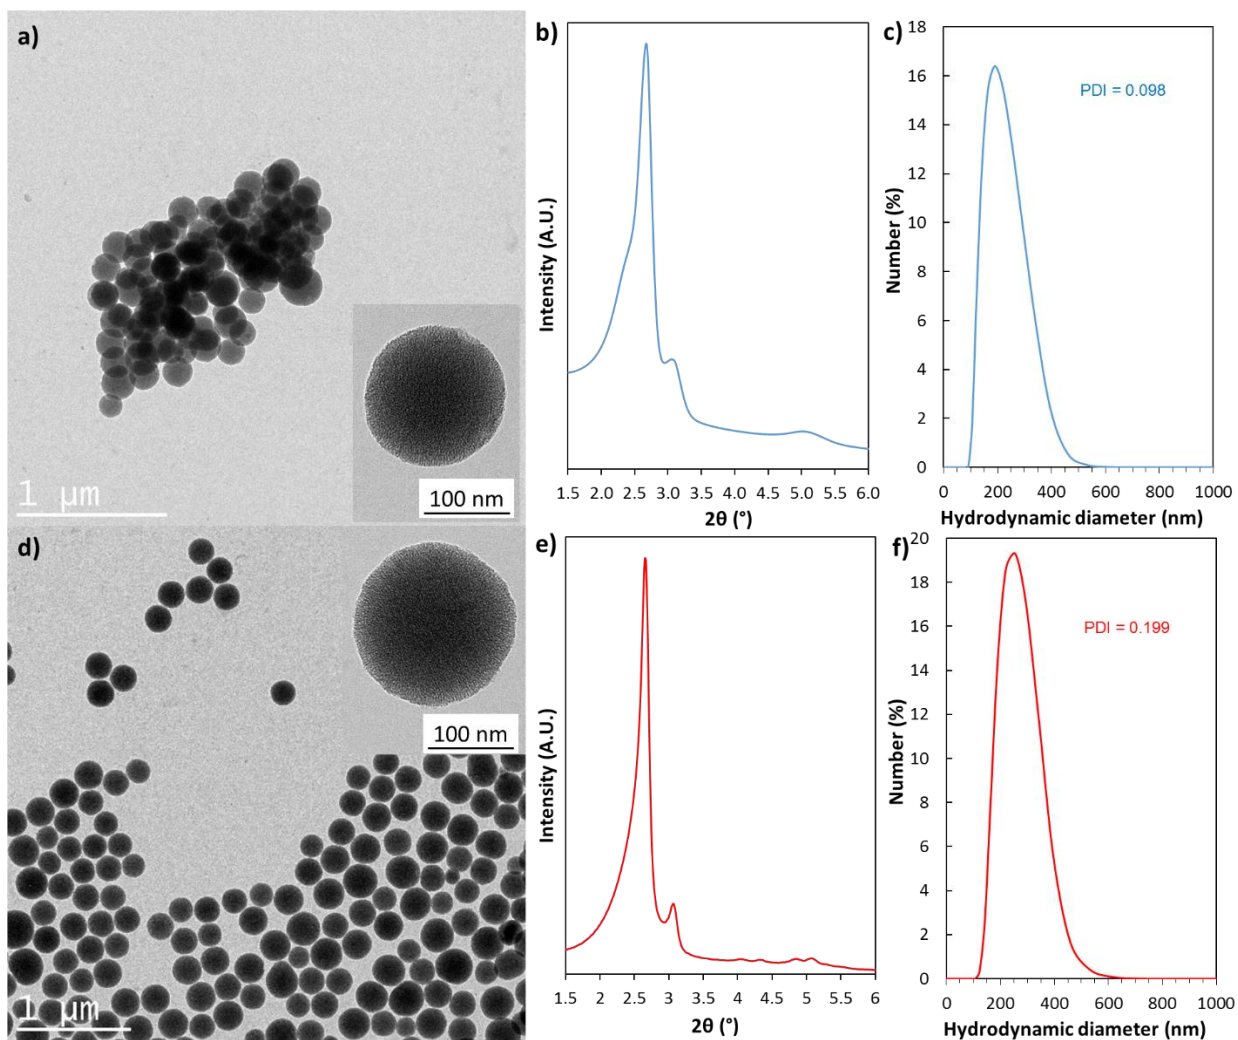

**Figure S1.** TEM images, low-angle XRD patterns and number-weighted hydrodynamic diameter distributions in water as determined by DLS analyses of (a, b, c) calcined and (d, e, f) extracted MSNs.

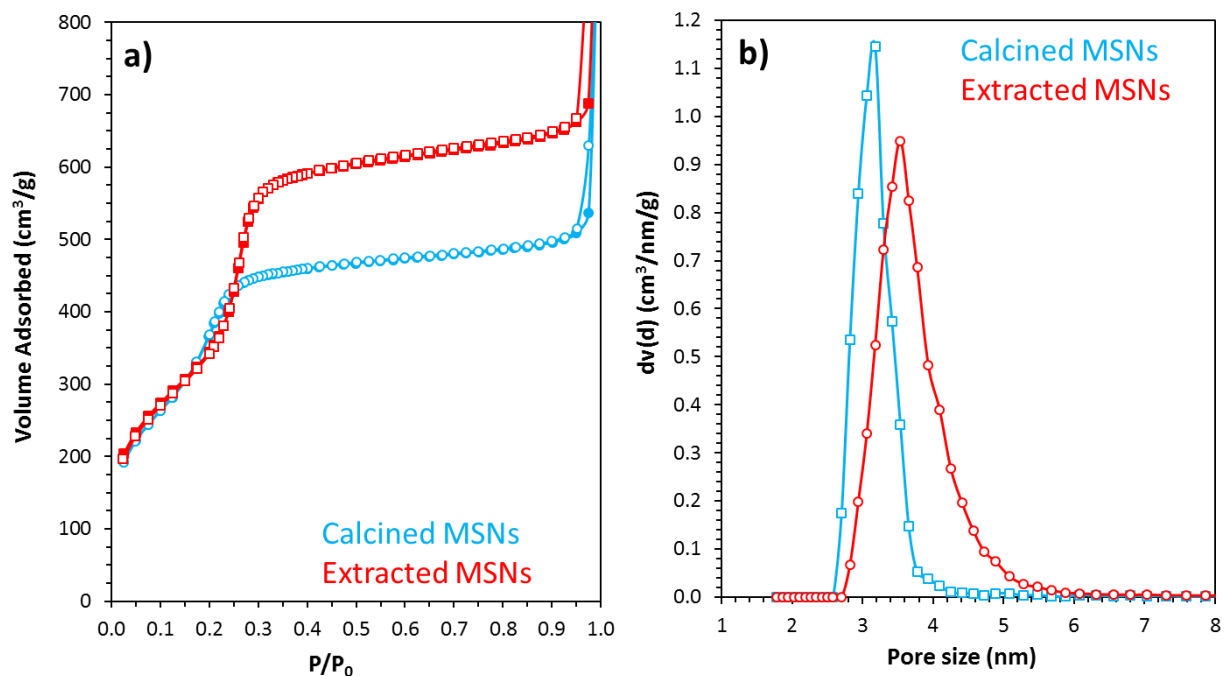

**Figure S2.** a) N<sub>2</sub> adsorption-desorption isotherms at -196 °C and b) corresponding NLDFT pore size distributions of calcined and extracted MSNs.

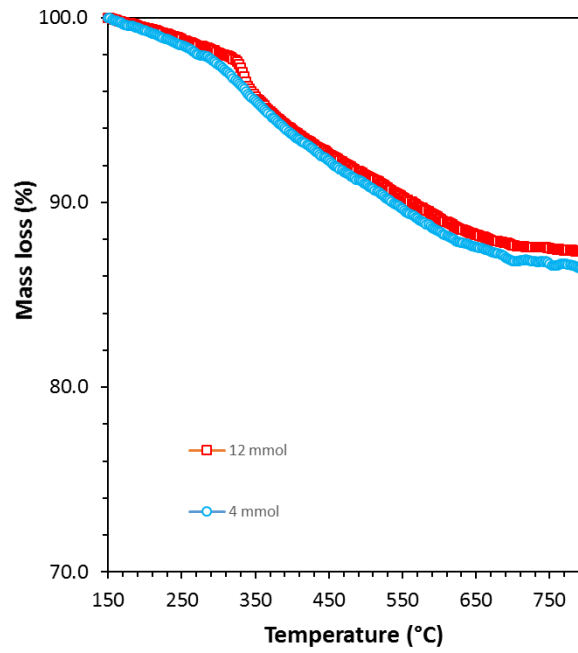

**Figure S3.** TGA data of post-grafted (PG) APTS-particles with different quantities of aminosilane on calcined MCM-48 MSNs.

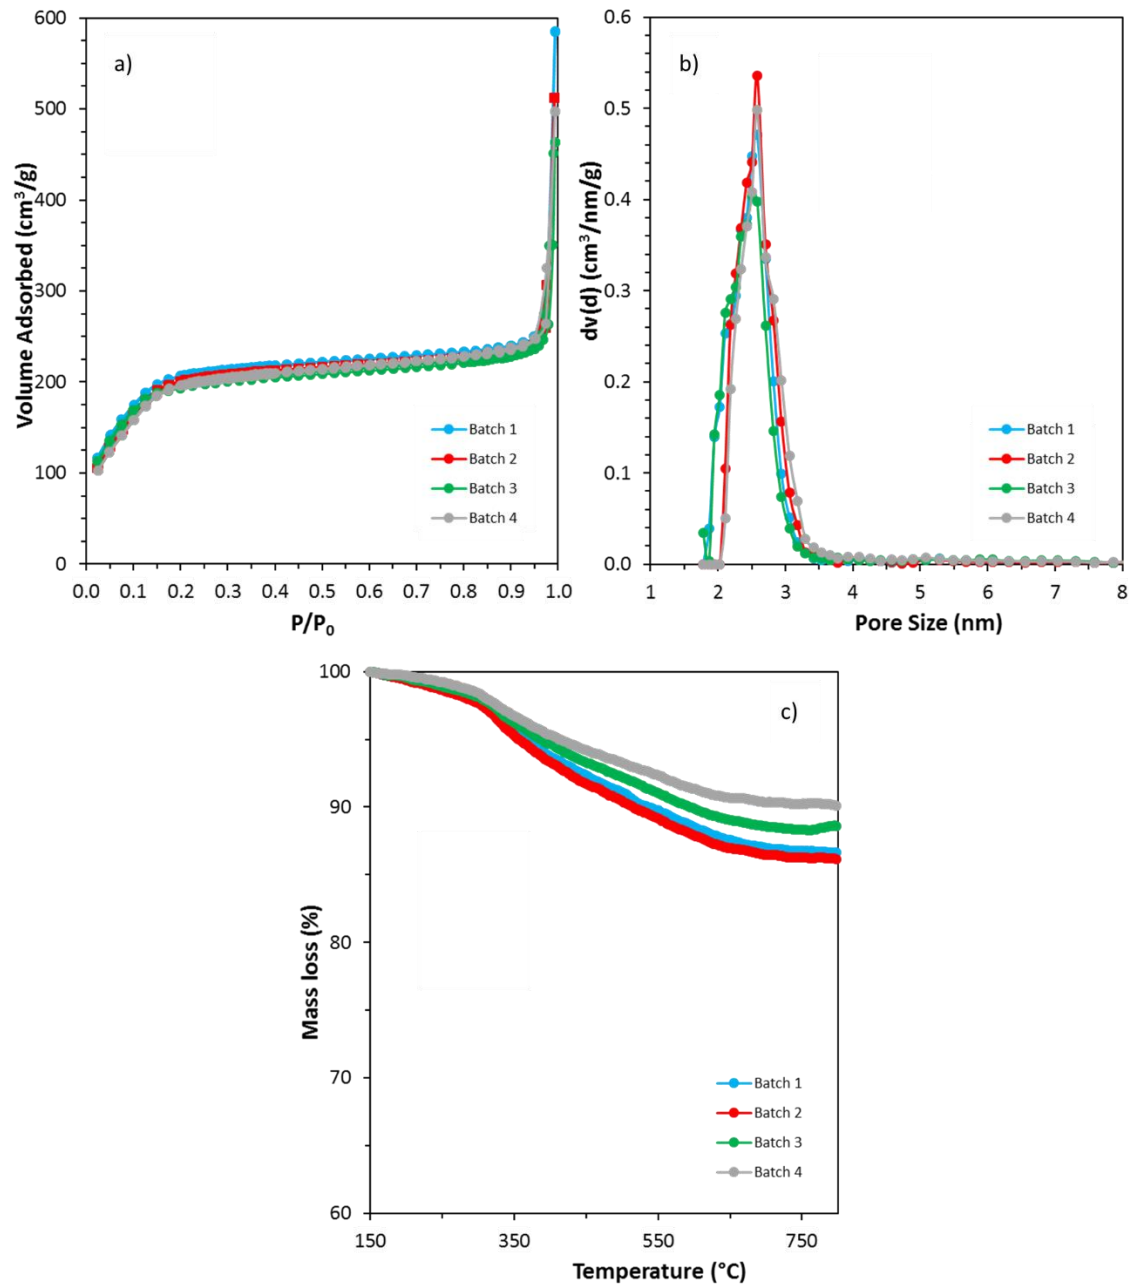

**Figure S4.** a) N<sub>2</sub> adsorption-desorption isotherms at -196 °C, b) corresponding NLDFT pore size distributions, and c) TGA plots of NH<sub>2</sub>-MSNs-PG in quadruplicates.

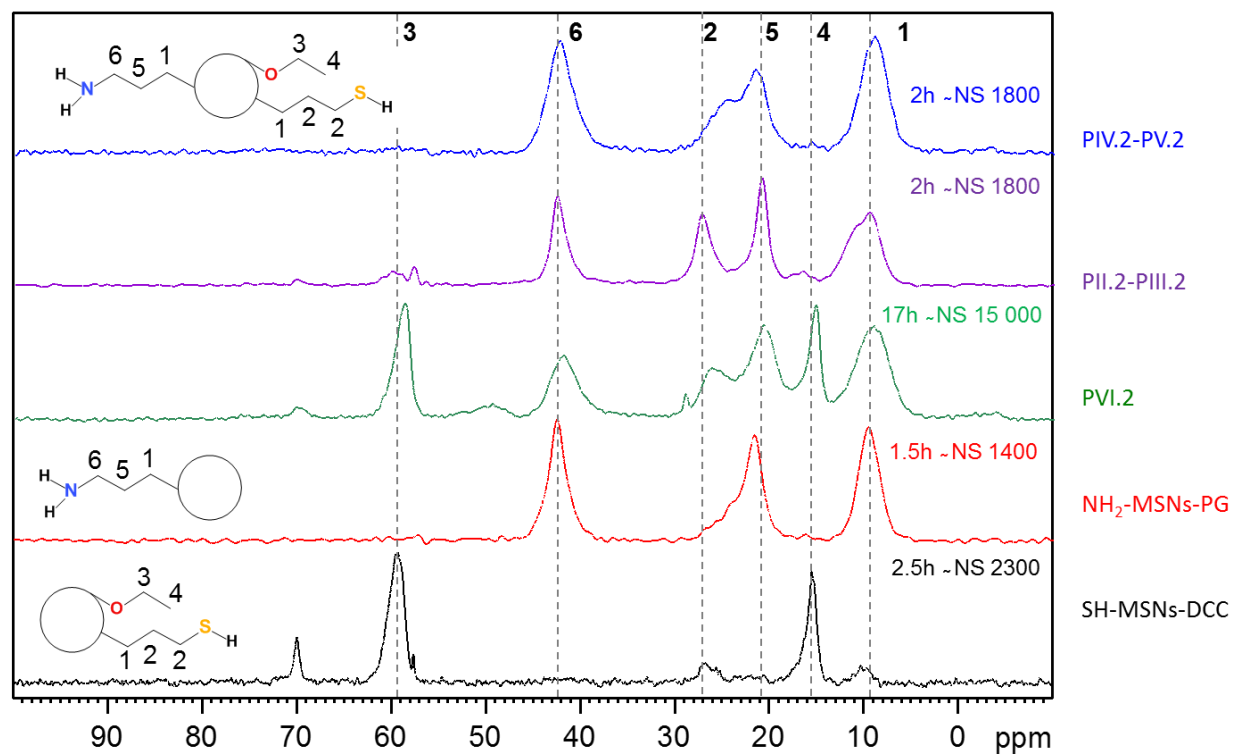

**Figure S5.**  $^{13}\text{C}$  CP/MAS solid state NMR spectra of various functionalized MSNs.

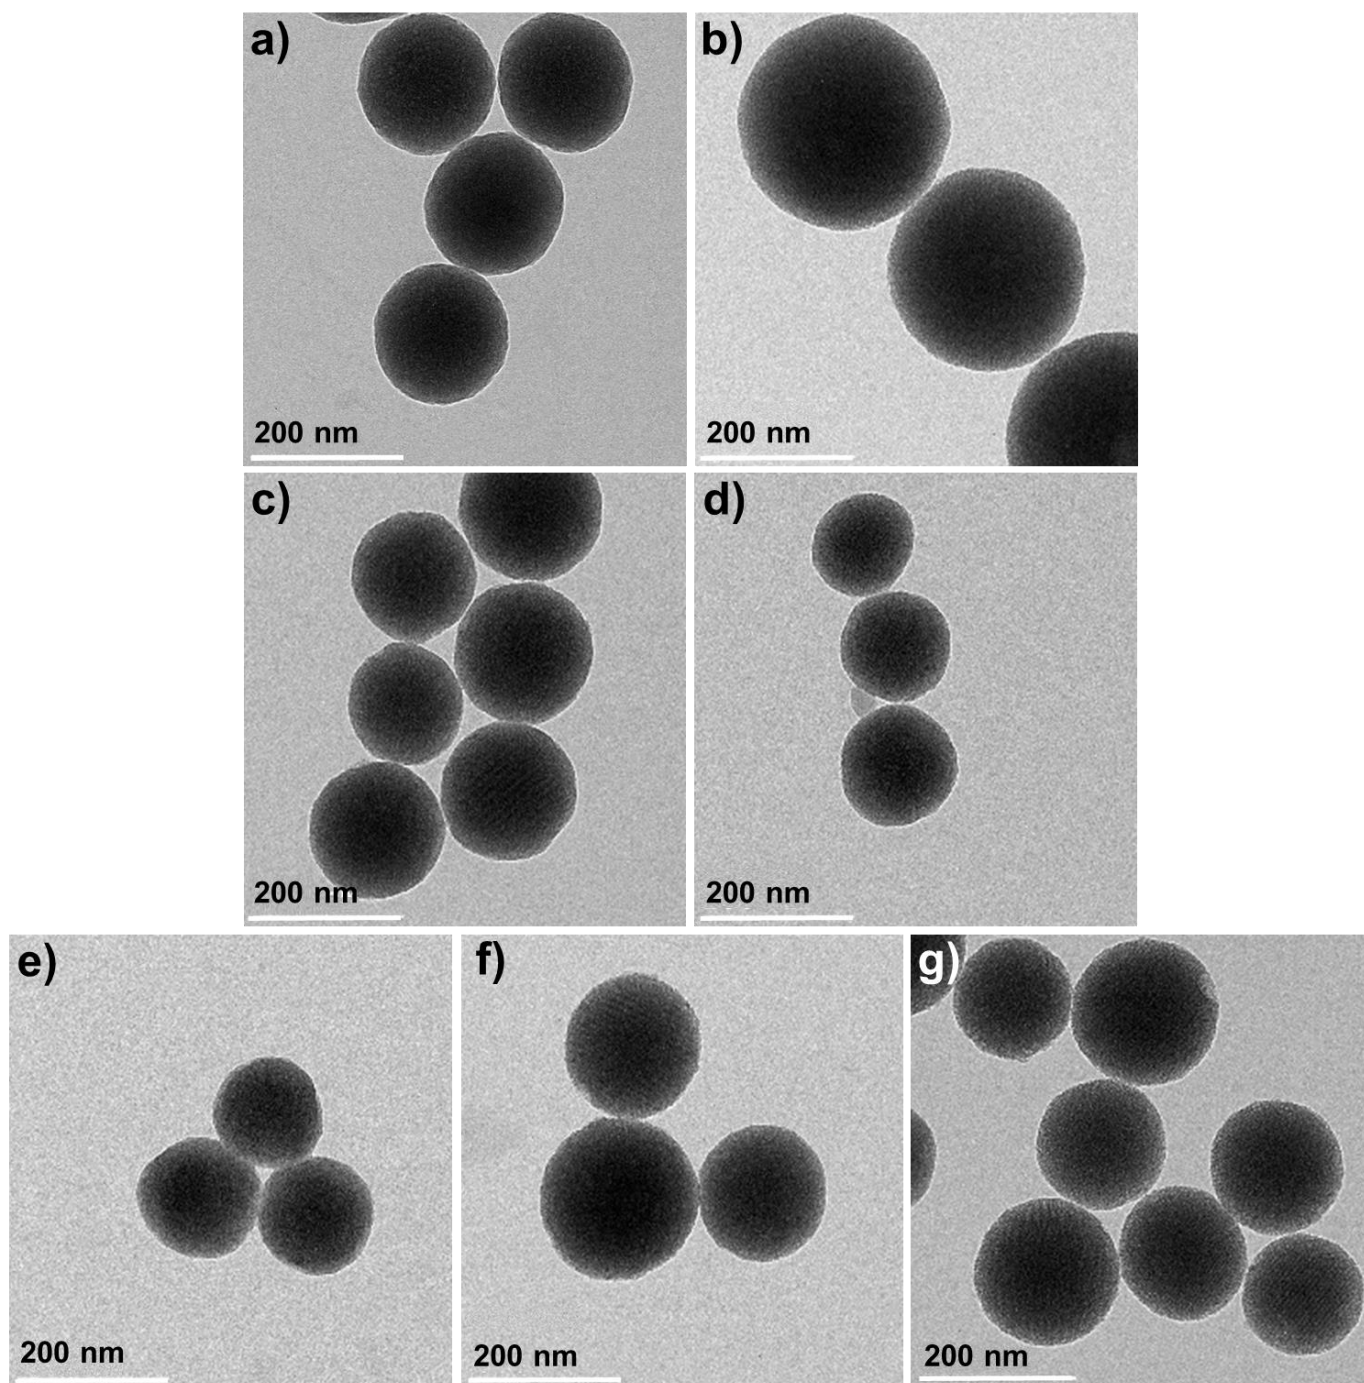

**Figure S6.** Magnified TEM images of amine- and thiol-functionalized MSNs obtained following the different synthesis pathways, a) PII-2 - PIII-2, b) PIV-2 – PV-2, c) PVI-2, d) PVII-2, e) PVIII-2, f) PIX-2 – PX-2, and g) PXI-3.

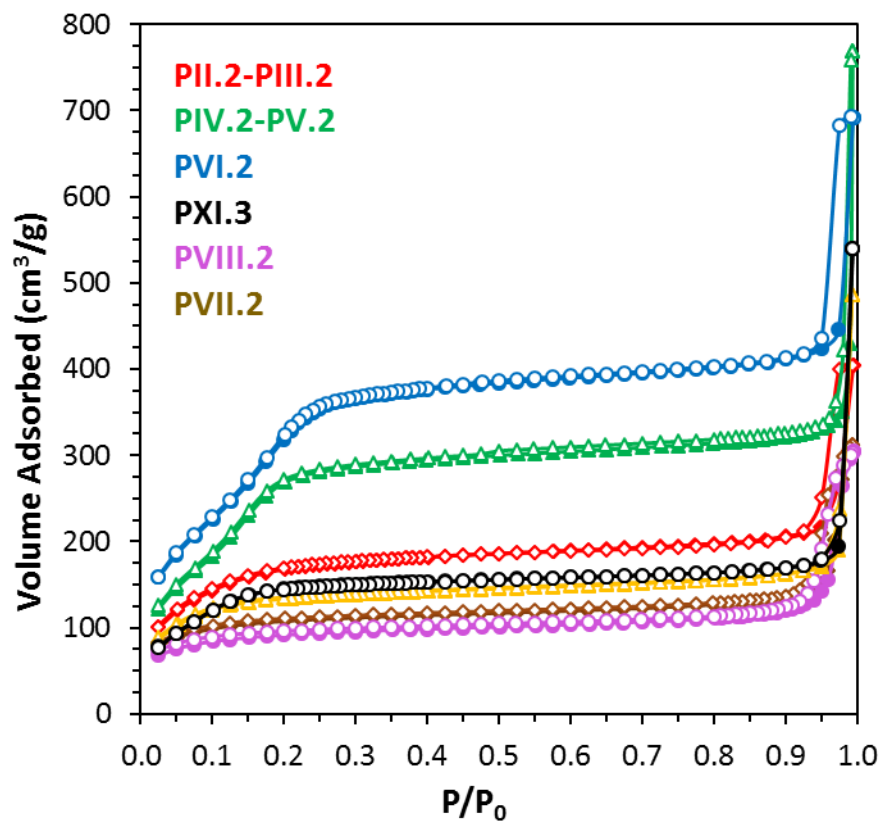

**Figure S7.** N<sub>2</sub> adsorption-desorption isotherms measured at -196 °C for the MSN samples from line 2 or 3 of Scheme 1.



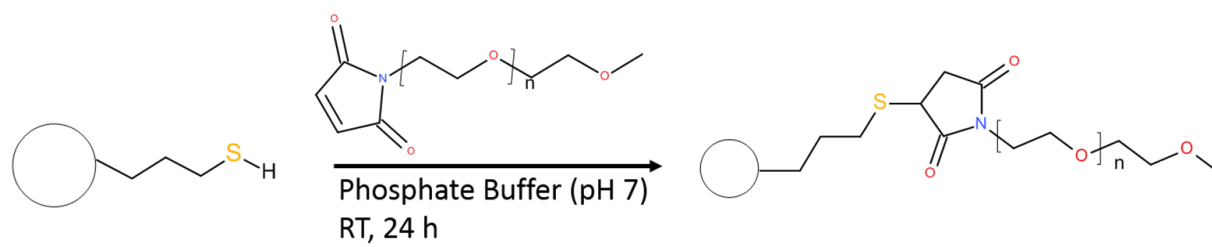

**Figure S8.** Reaction scheme of thiol-MSNs PEGylation.

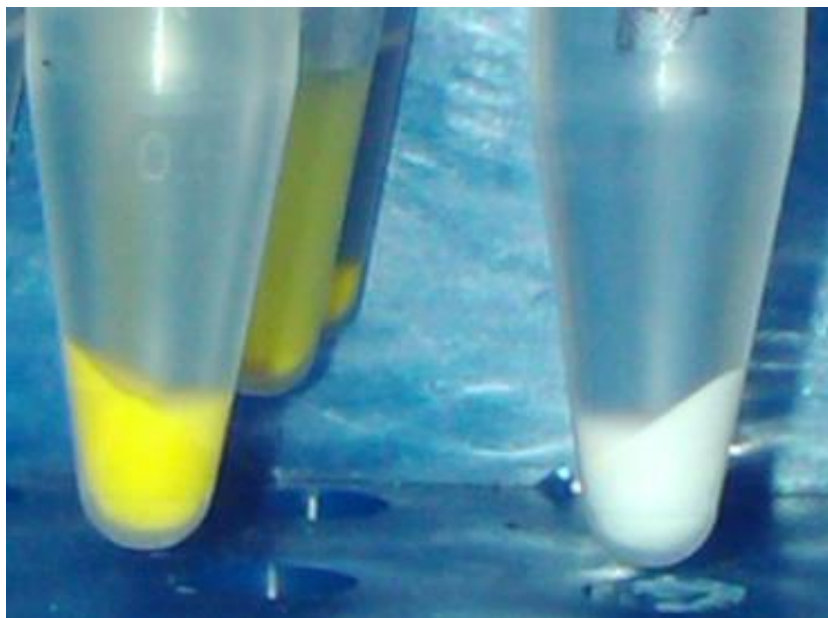

**Figure S9.** Visual comparison of functionalized MSNs synthesized according to pathway PV-3, with and without fluorescein maleimide.

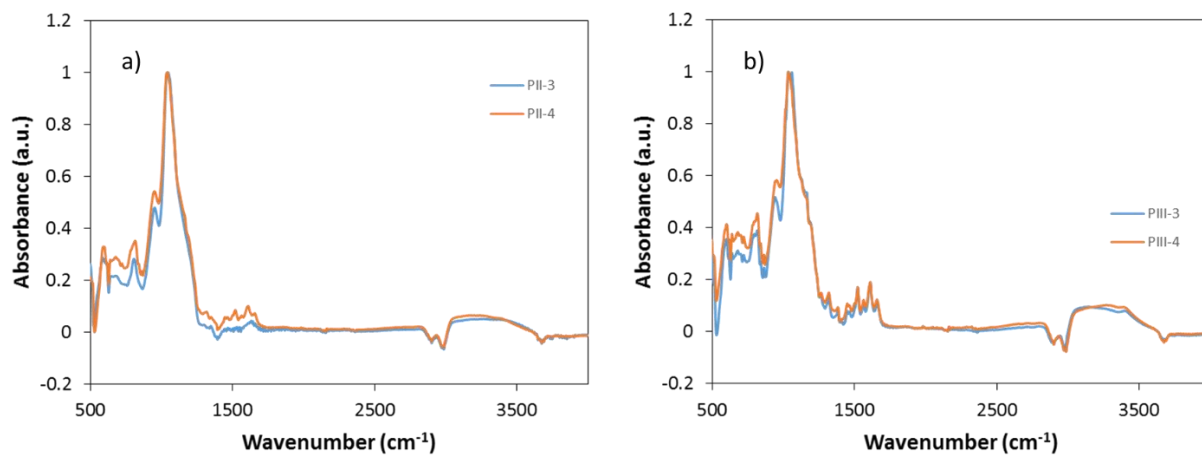

**Figure S10.** IR (ATR) measurements for a) pathway II and b) pathway III. For each spectrum, the absorbance is normalized to its maximum.

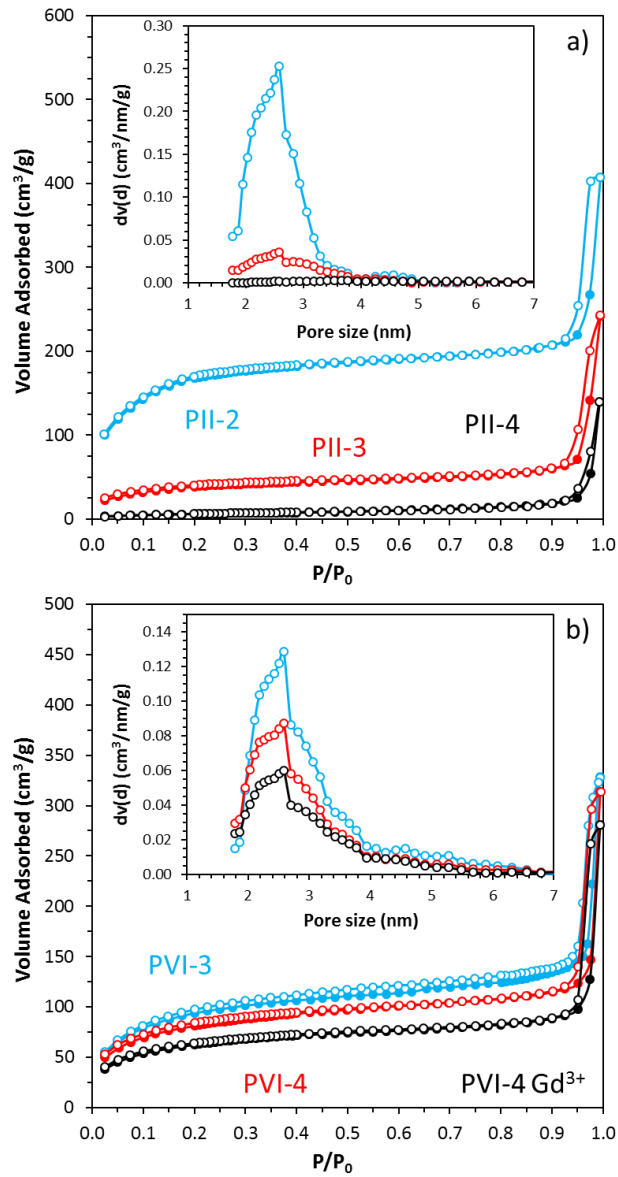

**Figure S11.** N<sub>2</sub> adsorption (plain symbols) – desorption (open symbols) isotherms at -196 °C and corresponding NLDFT PSD (insets) of MSNs functionalized using the synthesis pathways a) PII and b) PVI.

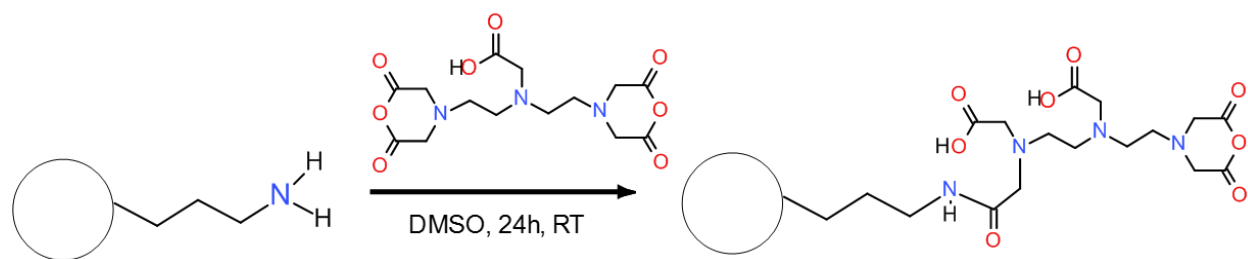

**Figure S12.** Reaction scheme of DTPA grafting onto NH<sub>2</sub>-MSNs.

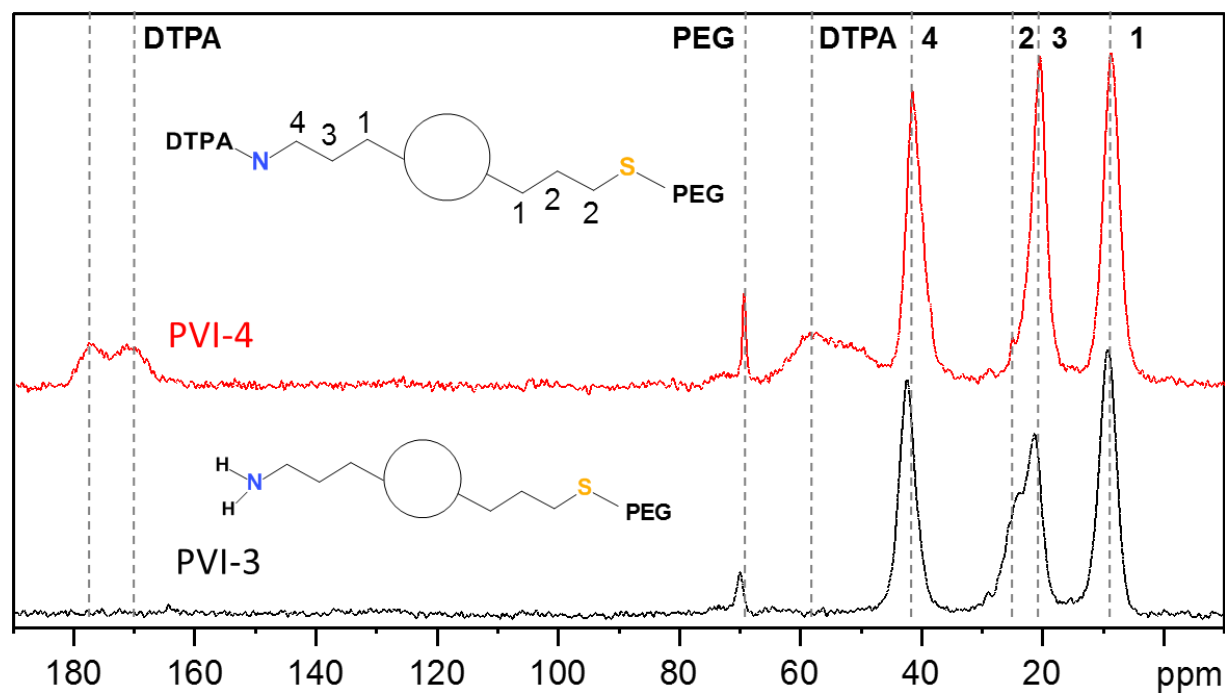

**Figure S13.**  $^{13}\text{C}$  CP solid state NMR spectra of functionalized MSNs synthesized via pathway PVI at different steps.

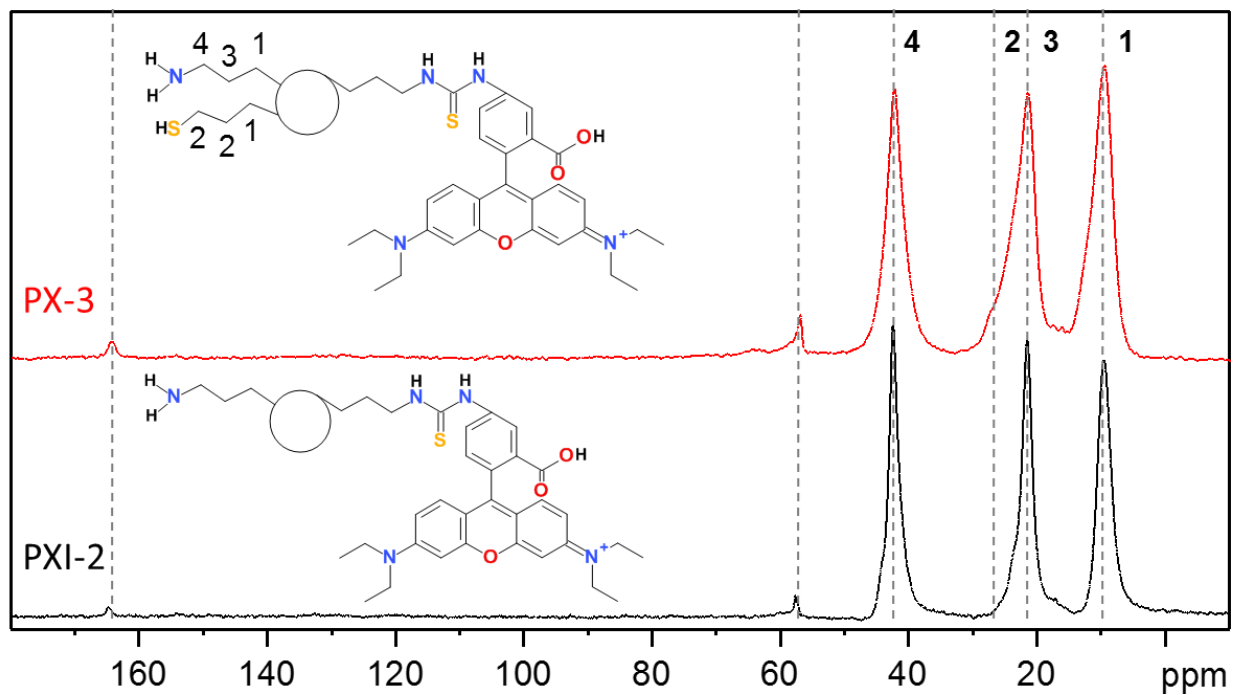

**Figure S14.**  $^{13}\text{C}$  CP solid state NMR spectra of functionalized MSNs after rhodamine grafting performed according to pathways PX and PXI.

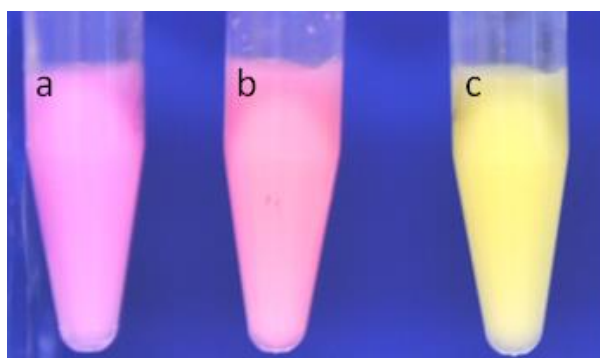

**Figure S15.** Photos of functional MSNs (PVI-4) following reactions with different fluorophores: a) Rhodamine B isothiocyanate, b) rhodamine B isothiocyanate and fluorescein-5-maleimide, and c) fluorescein-5-maleimide.



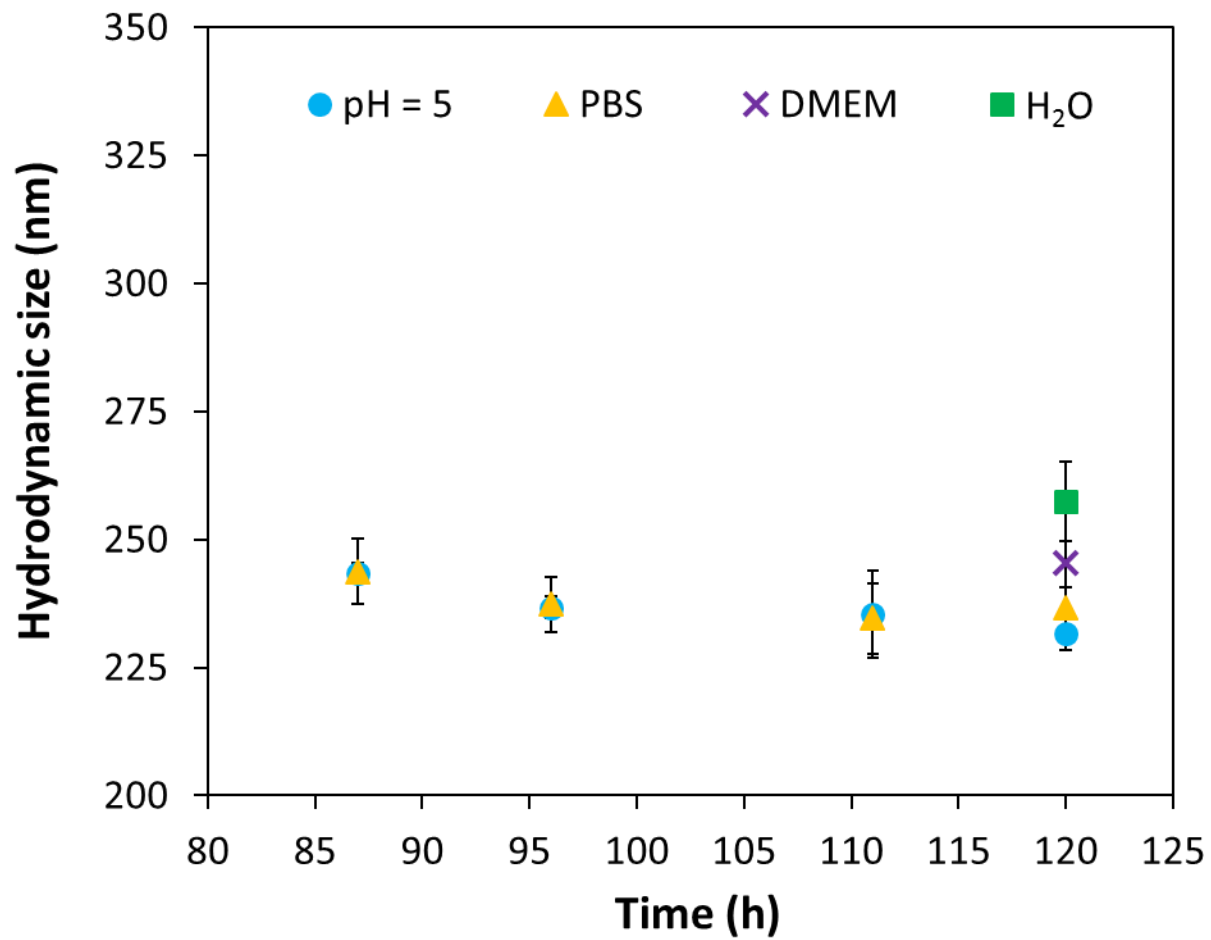

**Figure S16.** Hydrodynamic diameters of MSNs synthesized according to PVI-4 in different media and at different pH over time.

**Table S1.** N<sub>2</sub> physisorption at -196 °C data of the different samples at all the different steps mentioned in Scheme 1, a) BET specific surface area in m<sup>2</sup>g<sup>-1</sup>, b) Total pore volume in cm<sup>3</sup>g<sup>-1</sup> and c) NLDFT desorption mode pore size in nm, cursive values in parentheses = including Gd.

| a)                  | Step 1    | Step 2    | Step 3    | Step 4    | b) | Step 1      | Step 2      | Step 3      | Step 4      | c) | Step 1    | Step 2    | Step 3    | Step 4    |
|---------------------|-----------|-----------|-----------|-----------|----|-------------|-------------|-------------|-------------|----|-----------|-----------|-----------|-----------|
| <b>Pathway I</b>    | 1090 ± 74 |           | 195       |           |    | 0.92 ± 0.08 |             | 0.13        |             |    | 3.4 ± 0.1 |           | 2.6       |           |
| <b>Pathway II</b>   |           | 747 ± 190 | 146       | 23        |    |             | 0.42 ± 0.14 | 0.11        | 0.04        |    |           | 2.6 ± 0.3 | 2.6       | --        |
| <b>Pathway III</b>  |           | 747 ± 190 | 124 ± 58  | 62        |    |             | 0.42 ± 0.14 | 0.10 ± 0.04 | 0.07        |    |           | 2.6 ± 0.3 | 2.6       | --        |
| <b>Pathway IV</b>   | 1090 ± 74 | 771 ± 84  | 253 (187) | 297       |    | 0.92 ± 0.08 | 0.46 ± 0.08 | 0.20 (0.11) | 0.17        |    | 3.4 ± 0.1 | 2.9 ± 0.2 | 2.6 (1.9) | --        |
| <b>Pathway V</b>    | 1090 ± 74 | 771 ± 84  | 311 ± 60  | 255 (322) |    | 0.92 ± 0.08 | 0.46 ± 0.08 | 0.36 ± 0.06 | 0.30 (0.33) |    | 3.4 ± 0.1 | 2.9 ± 0.2 | 3.0 ± 0.2 | -- (2.6)  |
| <b>Pathway VI</b>   |           | 811 ± 209 | 358       | 307 (235) |    |             | 0.45 ± 0.13 | 0.20 ± 0.03 | 0.19 (0.15) |    |           | 2.7 ± 0.2 | 2.6       | 2.6 (2.6) |
| <b>Pathway VII</b>  | 549 ± 78  | 312 ± 171 | 281 ± 12  |           |    | 0.34 ± 0.07 | 0.27 ± 0.10 | 0.27 ± 0.05 |             |    | 2.6 ± 0.0 | 2.5 ± 0.2 | 2.6 ± 0.0 |           |
| <b>Pathway VIII</b> | 526 ± 31  | 321 ± 156 | 230 ± 47  |           |    | 0.31 ± 0.07 | 0.27 ± 0.08 | 0.19 ± 0.05 |             |    | 2.6 ± 0.0 | 2.5 ± 0.2 | 2.6 ± 0.0 |           |
| <b>Pathway IX</b>   | 781 ± 141 | 576 ± 113 | 281       |           |    | 0.38 ± 0.05 | 0.30 ± 0.03 | 0.20        |             |    | 2.5 ± 0.2 | 2.5 ± 0.2 | 2.6       |           |
| <b>Pathway X</b>    | 781 ± 141 | 576 ± 113 | 74        | 70        |    | 0.38 ± 0.05 | 0.30 ± 0.03 | 0.08        | 0.08        |    | 2.5 ± 0.2 | 2.5 ± 0.2 | 2.6       | --        |
| <b>Pathway XI</b>   | 781 ± 141 | 658       | 593       | 329       |    | 0.38 ± 0.05 | 0.31        | 0.27        | 0.25        |    | 2.5 ± 0.2 | 2.6       | 2.6       | 2.6       |

**Table S2.** Elemental analysis (EA) of the various MSNs materials (see Scheme 1), in molar ratios of a) C:N, b) C:S, and c) N:S. Cursive values in parentheses = including Gd.

| a)           | Step 1 | Step 2 | Step 3    | Step 4      | b) | Step 1 | Step 2 | Step 3      | Step 4      | c) | Step 2 | Step 3      | Step 4     |
|--------------|--------|--------|-----------|-------------|----|--------|--------|-------------|-------------|----|--------|-------------|------------|
| Pathway I    | --     |        | 153.1     |             |    | 12.2   |        | 110.9       |             |    |        | 0.7         |            |
| Pathway II   |        | 6.8    | 12.3      | 25.0        |    |        | 8.1    | 13.5        | 28.8        |    | 1.2    | 1.1         | 1.2        |
| Pathway III  |        | 6.8    | 17.9      | 39.3        |    |        | 8.1    | 23.2        | 36.7        |    | 1.2    | 1.3         | 0.9        |
| Pathway IV   | --     | 4.3    | 3.9 (4.3) | 4.4         |    | 12.2   | 26.4   | 60.9 (43.4) | 44.3        |    | 6.2    | 15.6 (10.1) | 10.0       |
| Pathway V    | --     | 4.3    | 4.2       | 4.0 (4.7)   |    | 12.2   | 26.4   | 22.7        | 53.8 (30.2) |    | 6.2    | 5.4         | 13.4 (6.4) |
| Pathway VI   |        | 8.0    | 21.1      | 13.3 (14.6) |    |        | 10.2   | 27.0        | 22.4 (27.0) |    | 1.3    | 1.3         | 1.7 (1.8)  |
| Pathway VII  | 4.0    | 6.1    | 11.0      |             |    | --     | 11.3   | 14.9        |             |    | 1.9    | 1.4         |            |
| Pathway VIII | 3.8    | 6.0    | 11.0      |             |    | --     | 8.7    | 12.2        |             |    | 1.4    | 1.1         |            |
| Pathway IX   | 3.2    | 3.8    | 4.5       |             |    | --     | 23.2   | 23.0        |             |    | 6.1    | 5.1         |            |
| Pathway X    | 3.2    | 3.8    | 4.5       | 5.3         |    | --     | 23.2   | 11.7        | 12.1        |    | 6.1    | 2.6         | 2.3        |
| Pathway XI   | 3.2    | 4.0    | 3.8       | 5.5         |    | --     | --     | 31.5        | 34.9        |    | --     | 8.3         | 6.4        |

**Table S3.** Elemental analysis (EA) of the various MSNs materials (see Scheme 1), in mmol g<sup>-1</sup> of a) carbon, b) hydrogen, c) nitrogen, and d) sulfur.

| a)           | Step 1 | Step 2 | Step 3      | Step 4      | b) | Step 1 | Step 2 | Step 3      | Step 4      | c) | Step 1 | Step 2 | Step 3    | Step 4    | d) | Step 1 | Step 2 | Step 3    | Step 4    |
|--------------|--------|--------|-------------|-------------|----|--------|--------|-------------|-------------|----|--------|--------|-----------|-----------|----|--------|--------|-----------|-----------|
| Pathway I    | 5.2    |        | 13.9        |             |    | 25.7   |        | 39.0        |             |    | --     |        | 0.1       |           |    | 0.4    |        | 0.1       |           |
| Pathway II   |        | 6.1    | 9.7         | 16.8        |    |        | 33.2   | 31.8        | 33.3        |    |        | 0.9    | 0.8       | 0.7       |    |        | 0.8    | 0.7       | 0.6       |
| Pathway III  |        | 6.1    | 13.9        | 20.3        |    |        | 33.2   | 32.9        | 33.2        |    |        | 0.9    | 0.8       | 0.5       |    |        | 0.8    | 0.6       | 0.6       |
| Pathway IV   | 5.2    | 8.8    | 10.4 (11.7) | 11.7        |    | 25.7   | 36.2   | 36.8 (37.4) | 37.4        |    | --     | 2.1    | 2.7 (2.7) | 2.7       |    | 0.4    | 0.3    | 0.2 (0.3) | 0.3       |
| Pathway V    | 5.2    | 8.8    | 7.5         | 9.4 (10.4)  |    | 25.7   | 36.2   | 30.9        | 33.1 (33.9) |    | --     | 2.1    | 1.8       | 2.3 (2.2) |    | 0.4    | 0.3    | 0.3       | 0.2 (0.3) |
| Pathway VI   |        | 4.2    | 10.6        | 10.3 (10.9) |    |        | 32.2   | 35.0        | 31.2 (34.2) |    |        | 0.5    | 0.5       | 0.8 (0.7) |    |        | 0.4    | 0.4       | 0.5 (0.4) |
| Pathway VII  | 3.8    | 5.8    | 8.1         |             |    | 30.3   | 30.8   | 26.6        |             |    | 1.0    | 1.0    | 0.8       |           |    | --     | 0.5    | 0.6       |           |
| Pathway VIII | 3.3    | 5.3    | 8.1         |             |    | 30.4   | 28.8   | 26.6        |             |    | 0.9    | 0.9    | 0.7       |           |    | --     | 0.6    | 0.7       |           |
| Pathway IX   | 5.0    | 5.8    | 6.2         |             |    | 31.5   | 33.4   | 28.6        |             |    | 1.6    | 1.5    | 1.4       |           |    | --     | 0.3    | 0.3       |           |
| Pathway X    | 5.0    | 5.8    | 7.4         | 8.0         |    | 31.5   | 33.4   | 30.0        | 30.6        |    | 1.6    | 1.5    | 1.6       | 1.5       |    | --     | 0.3    | 0.6       | 0.7       |
| Pathway XI   | 5.0    | 5.0    | 5.6         | 7.1         |    | 31.5   | 28.7   | 28.1        | 26.4        |    | 1.6    | 1.5    | 1.5       | 1.3       |    | --     | --     | 0.2       | 0.2       |

**Table S4.** Mass loss (150 – 800 °C) in % of the different samples at all the different steps analyzed by TGA. Cursive values in parentheses = including Gd.

|                     | Step 1 | Step 2 | Step 3 | Step 4 |
|---------------------|--------|--------|--------|--------|
| <b>Pathway I</b>    | 12 ± 1 |        | 32     |        |
| <b>Pathway II</b>   |        | 14 ± 4 | 22     | 36     |
| <b>Pathway III</b>  |        | 14 ± 4 | 32     | 34     |
| <b>Pathway IV</b>   | 12 ± 1 | 16 ± 3 | 23(25) | 19     |
| <b>Pathway V</b>    | 12 ± 1 | 16 ± 3 | 16 ± 1 | 21(21) |
| <b>Pathway VI</b>   |        | 14 ± 3 | 25     | 26(25) |
| <b>Pathway VII</b>  | 13 ± 1 | 14 ± 2 | 17     |        |
| <b>Pathway VIII</b> | 13 ± 2 | 14 ± 2 | 17     |        |
| <b>Pathway IX</b>   | 12 ± 2 | 13 ± 2 | 12     |        |
| <b>Pathway X</b>    | 12 ± 2 | 13 ± 2 | 14 ± 2 | 17     |
| <b>Pathway XI</b>   | 12 ± 2 | 10 ± 2 | 13 ± 1 | 12     |
